CORRECTION

# Correction: Epidemiological Characteristics of Lower Extremity Cellulitis after a Typhoon Flood

Pei-Chen Lin, Hung-Jung Lin, How-Ran Guo, Kuo-Tai Chen

There is an error in affiliation 5 for author Kuo-Tai Chen. Affiliation 5 should be: Department of Emergency Medicine, School of Medicine, College of Medicine, Taipei Medical University, Taipei, Taiwan.

## Reference

1. Lin P-C, Lin H-J, Guo H-R, Chen K-T (2013) Epidemiological Characteristics of Lower Extremity Cellulitis after a Typhoon Flood. PLoS ONE 8(6): e65655. doi: [10.1371/journal.pone.0065655](https://doi.org/10.1371/journal.pone.0065655) PMID: [23785441](https://pubmed.ncbi.nlm.nih.gov/23785441/)

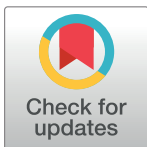

## OPEN ACCESS

**Citation:** Lin P-C, Lin H-J, Guo H-R, Chen K-T (2017) Correction: Epidemiological Characteristics of Lower Extremity Cellulitis after a Typhoon Flood. PLoS ONE 12(1): e0171401. doi:10.1371/journal.pone.0171401

**Published:** January 30, 2017

**Copyright:** © 2017 Lin et al. This is an open access article distributed under the terms of the [Creative Commons Attribution License](https://creativecommons.org/licenses/by/4.0/), which permits unrestricted use, distribution, and reproduction in any medium, provided the original author and source are credited.
